# Supplementary material
Source: Elsevier journal article supplement (https://www.sciencedirect.com/science/article/pii/S1138359317301466)
Supplement: mmc1 [file S1138359317301466:mmc1.pdf]

## **ANEXO I**

### **CÓMO SER UN MÉDICO DE FAMILIA**

DEFINICIÓN DE ESTÁNDARES ASISTENCIALES EN LA FORMACIÓN DE RESIDENTES DE MEDICINA FAMILIAR Y COMUNITARIA. UN ESTUDIO DELPHI.

1. Correo electrónico
2. Comunidad Autónoma a la que pertenece
3. Si trabaja en Andalucía, indique en qué Unidad Docente
4. Edad
5. ¿Cuántos años lleva como tutor/a de residentes MFYC?
6. Sexo

Para cada una de las siguientes preguntas debe dar una respuesta con valor numérico para cada nivel de aprendizaje:

- Observador/a (observa cómo lo realiza el tutor/a y las comenta)
- Tutorizado/a (el/la residente lo realiza siendo observado por su tutor/a)
- Autónomo/a (el/la residente lo realiza y comenta posteriormente con el tutor/a)

### **INTERVENCIONES INDIVIDUALES**

#### **RETINOGRAFÍAS**

7. Aunque la realización de la retinografía puede ser una técnica de enfermería, el conocimiento de cómo se realiza correctamente, como se maneja el software y de cómo se interpretan las imágenes de la retina es importante en la formación del médico de familia. Desde su punto de vista

¿cuántas RETINOGRAFÍAS debe valorar el/la residente para contar con suficiente casuística y saber interpretarlas correctamente?

## ESPIROMETRÍA

8. Al igual que la retinografía, la realización de la espirometría puede ser una técnica de enfermería, pero el conocimiento de cómo se realiza correctamente y de cómo se interpretan los valores y las curvas, es importante en la formación del médico de familia. Desde su punto de vista ¿cuántas ESPIROMETRÍAS debe realizar el/la residente para contar con suficiente casuística y poder interpretarlas correctamente?

## ANTICOAGULACIÓN

9. Los pacientes anticoagulados requieren un control exhaustivo del tratamiento con constantes ajustes, precisando conocer las interacciones farmacológicas y alimentarias para prevenir posibles complicaciones. En su opinión, ¿cuántos CONTROLES DE ANTICOAGULACIÓN debe realizar el/la residente para poder ajustar correctamente los tratamientos anticoagulantes?

## CIRUGÍA MENOR

10. La crío o electro coagulación es una de las técnicas utilizadas en cirugía menor. Cuando se utiliza esta técnica se pueden tratar varias lesiones en una misma persona, a cada sesión de tratamiento aplicada a una misma persona la denominaremos INTERVENCIÓN, aunque se traten en ella varias lesiones. Desde su punto de vista ¿cuántas INTERVENCIONES debe realizar el/la residente con esta técnica para aplicarla correctamente?

11. Desde su punto de vista ¿cuántas INTERVENCIONES (exéresis de quistes, queratosis, cirugía ungueal, etc no tratadas con

crio/electrocoagulación) debe realizar el/la residente para conocer el funcionamiento organizativo de cirugía menor, su sistema de registro y evaluación, el manejo del consentimiento informado, tener oportunidad de atender a una casuística diversificada, saber elegir la técnica adecuada en cada paciente y aplicarla correctamente?

## INFILTRACIONES

12. La patología articular es muy prevalente, pero con frecuencia el control del dolor que ocasionan no se consigue con medicación oral, siendo una buena alternativa la infiltración con antiinflamatorios cuando el médico de familia maneja dicha técnica. Considerando la infiltración del hombro, codo, rodilla y talón, ¿cuántas INFILTRACIONES cree que debe realizar el/la residente para aplicarla correctamente?

## TELEDERMATOLOGÍA

13. Entendiendo por CONSULTA DE TELEDERMATOLOGÍA la consulta en la que se un/una médico de familia realiza una valoración de la lesión dermatológica sospechosa en el centro de salud y, si lo considera indicado, realiza una fotografía que se envía a través de un software específico al/la especialista en dermatología para su valoración. En su opinión, ¿cuántas personas debe atender el/la residente en CONSULTAS DE TELEDERMATOLOGÍA para ver una casuística suficientemente diversificada y aprender a valorar correctamente las lesiones de la piel y derivar en caso necesario?

## SALUD DE LA MUJER

### SEGUIMIENTO DE EMBARAZO

14. Aunque el seguimiento de embarazos en atención primaria puede estar asignado en algunos centros de salud a la matrona o a enfermería, consideramos importante la formación del médico de familia en la atención al mismo y en el despistaje de embarazos de riesgo. Entendiendo por CONSULTA DE EMBARAZO la atención individualizada y protocolizada a una embarazada, ¿cuántas CONSULTAS de embarazo debe realizar el/la residente para llevarlas a cabo correctamente?

#### ECOGRAFÍA GINECOLÓGICA - INSERCIÓN DIU

15. La inserción de DIU y la realización de ecografía ginecológica son técnicas que van asociadas y que no se realizan en todos los centros de salud, sin embargo la formación de los/les residentes en ellas nos parece importante. Desde su punto de vista, ¿a cuántas mujeres debe realizar el/la residente una ECOGRAFÍA GINECOLÓGICA CON INSERCIÓN DE DIU para llegar a hacerlas correctamente?

#### DETECCIÓN PRECOZ DE CÁNCER DE CÉRVIX

16. La toma de muestras para estudio citológico del cérvix puede ser una técnica enfermera o ser realizada por médicos/as de familia que han de saber realizarla correctamente para después interpretarla y recomendar el seguimiento adecuado. En su opinión ¿a cuántas mujeres debe tomar muestra para CITOLOGÍA el/la residente para saber hacer la técnica correctamente?

#### PLANIFICACIÓN FAMILIAR

17. Entendiendo por CONSULTA DE PLANIFICACIÓN FAMILIAR la consulta a una persona para orientarle sobre el método anticonceptivo que más le conviene. En su opinión ¿a cuántas personas debe atender el/la residente en

CONSULTAS DE PLANIFICACIÓN FAMILIAR para poder atender una casuística suficientemente diversificada y aprender a recomendar el método de planificación adecuado en diferentes casos representativos de la mayoría de las consultas?

## EDUCACIÓN MATERNAL

18. La educación maternal es habitualmente una actividad de matronas o de enfermería que se realiza de forma grupal. Consideramos que el/la médico de familia debe conocer cómo se desarrollan, no para que sean quienes las impartan, sino como parte de su papel en la atención al embarazo. Partiendo de esta idea, ¿en cuántas SESIONES de educación maternal opina que debe participar el/la residente?

## INTERVENCIONES SOBRE EL ESTILO DE VIDA Y CUIDADOS

### VALORACIÓN GERIÁTRICA Y PACIENTES INMOVILIZADOS

19. La valoración de las necesidades y problemas de salud física, psicológicos y sociales de las personas ancianas y de las inmovilizadas debería ser parte del abordaje multidisciplinar de estos casos, en el que los/las médicos de familia tienen un papel relevante. En su opinión, ¿a cuántas personas de estas características debe hacer el/la residente una VALORACIÓN para saber realizarlas de forma correcta?

### TÉCNICAS DE ENFERMERÍA

20. Consideramos que es importante que el médico de familia conozca cómo se realizan las técnicas de enfermería más comunes para mejorar la calidad de su trabajo en equipo. Desde su punto de vista, ¿a cuántas personas debe atender el/la residente en CONSULTAS DE ENFERMERÍA para conocer las

técnicas de enfermería más comunes en atención primaria (cura de heridas, sondaje uretral y nasogástrico, extracciones, prevención de úlceras por presión, cura de úlceras vasculares y por presión, cuidado del pie diabético, consejo dietético individualizado, etc)

#### INTERVENCIÓN ANTITABACO INDIVIDUAL

21. Considerando que la intervención individual avanzada sobre tabaquismo requiere una correcta valoración del grado de motivación, del nivel de dependencia y del uso de técnicas de entrevista motivacional y otras instrumentales como la cooximetría. En su opinión ¿a cuántas personas debe atender el/la residente en CONSULTA DE INTERVENCIÓN ANTITABACO AVANZADA INDIVIDUAL para contar con una casuística suficientemente diversificada y aprender a atenderla correctamente?

#### INTERVENCIÓN ANTITABACO GRUPAL

22. Considerando que la intervención grupal avanzada sobre tabaquismo requiere del conocimiento de técnicas de trabajo grupales para el abordaje del tabaquismo. En su opinión, ¿en cuántas SESIONES GRUPALES DE INTERVENCIÓN AVANZADA EN TABAQUISMO debe participar el/la residente para aprender a realizarlas como conductor/a del grupo correctamente?

#### ATENCIÓN GRUPAL A PROBLEMAS DE SALUD

23. Además de las mencionadas para la promoción de hábitos saludables en los casos del tabaquismo, la actividad física y la alimentación equilibrada, existen otras intervenciones grupales que se llevan a cabo en atención primaria, como pueden ser las de educación diabetológica, abordaje grupal del dolor crónico no oncológico, grupos socioeducativos, etc. Estas actividades

suelen consistir en un programa de entre 3 y 8 reuniones de grupo, en función de los contenidos. Suponiendo una duración promedio de 4 sesiones y según su opinión, ¿en cuántas de estas sesiones debe participar el/la residente para que pueda saber cómo realizarlas?

## **ALIMENTACIÓN Y ACTIVIDAD FÍSICA**

24. Considerando que la intervención grupal avanzada sobre ALIMENTACIÓN Y ACTIVIDAD FÍSICA requiere del conocimiento de técnicas de trabajo grupales para el abordaje estilos de vida así como de nutrición y cocina ¿en cuántas SESIONES GRUPALES DE CONSEJO DIETÉTICO AVANZADO opina que debe participar el/la residente para aprender a realizarlas como conductor/a del grupo correctamente?

## **ATENCIÓN A LA COMUNIDAD**

INTERVENCIONES COMUNITARIAS CON JÓVENES (en Andalucía Plan Forma Joven)

25. En algunos centros de salud se realizan actividades grupales dirigidas a jóvenes y adolescentes, bien en el propio centro o desplazándose a centros educativos, sociales, etc. En ellas se trata sobre los problemas que preocupan con más frecuencia a estas edades (sexualidad, adicciones, violencia de género, conflictos familiares, etc) y, como en el caso de la atención individual, requieren de técnicas específicas de comunicación con este grupo de edad y técnicas de intervenciones en grupos. Desde su punto de vista ¿en cuántas sesiones grupales con jóvenes o adolescentes debe participar el/la residente para que aprenda cómo llevarlas a cabo?

## **ATENCIÓN A SITUACIONES DE RIESGO SOCIAL**

26. Las intervenciones en situación de riesgo social son de carácter multidisciplinario y uno de los actores involucrados en ellas es el/la médico/a de familia. ¿En cuántas intervenciones conjuntas con el/la asistente social piensa que debe participar el/la residente para saber detectar, intervenir y prevenir las situaciones de riesgo social?

## **FORMACIÓN**

27. Entendiendo por SESIONES CLÍNICAS las reuniones en las que miembros del equipo de atención primaria plantean el abordaje de un caso clínico concreto, en cuantas SESIONES CLÍNICAS opina que debe participar el/la residente como:

- Ponente
- Asistente

28. Entendiendo por sesiones de FORMACIÓN CONTINUADA aquellas en las que la reunión del miembros del equipo de atención primaria trata del abordaje de algún problema de salud mediante exposición teórica o práctica, en cuantas sesiones de FORMACIÓN CONTINUADA opina que debe participar el/la residente como:

- Ponente
- Asistente

29. En cuáles de las competencias consultadas tiene EXPERIENCIA PERSONAL en la formación de residentes a lo largo de su ejercicio como tutor/a:

- Retinografía
- Espirometría

- Anticoagulación
- Cirugía menor
- Infiltraciones
- Teledermatología
- Seguimiento de embarazo
- Ecografía ginecológica/DIU
- Prevención precoz del Cáncer de Cérvix
- Planificación familiar
- Educación maternal
- Valoración geriátrica
- Técnicas de enfermería
- Antitabaco
- Atención grupal a problemas de salud
- Alimentación y actividad física
- Intervenciones comunitarias con jóvenes
- Atención a situaciones de riesgo social
- Formación (preparación de sesiones
